# Supplementary material for: Traditional Herbal Formula Taeeumjowi-Tang (TJ001) Inhibits p53-Mutant Prostate Cancer Cells Growth by Activating AMPK-Dependent Pathway
Source: PubMed Central journal article supplement (PMC6525874; doi:10.1155/2019/2460353), 2019-05-05
Supplement: 2460353.f1.pdf [file 2460353.f1.pdf]

**Supplementary legend**

2

3 Supplementary 1: Effects of TJ001 on metabolic stress in PC3 and LNCaP cells. Cells were  
4 incubated for 48 h with or without TJ001 (200 µg/mL). (a) The content of ATP was measured  
5 using a commercial kit (Promega, USA). Data are presented as the mean ± SD. We analyzed  
6 (b) the expression of lipid metabolism related proteins.

7

8 Supplementary 2: TJ001 had no effects on cell growth in PC3 and LNCaP cells. Cell cycle  
9 distribution of prostate cancer cells measured by flow cytometry. (a) Cells were incubated with  
10 TJ001 (200 µg/ml) treatment for 48 h. All floating and attached cells were harvested and fixed  
11 in 95% ethanol. The stained cells with PI were performed to examine cell cycle progression (b)  
12 The graphs showed a cell cycle distribution in PC3 and LNCaP cells. Data represents Mean ±  
13 SD (c) CKI (Cyclin kinase inhibitor) and cyclin proteins, involved with G1/S phase arrest, were  
14 performed. (d) Total and phosphorylated forms of protein synthesis-related proteins in mTOR  
15 signaling pathway were detected using Immunoblotting assay.

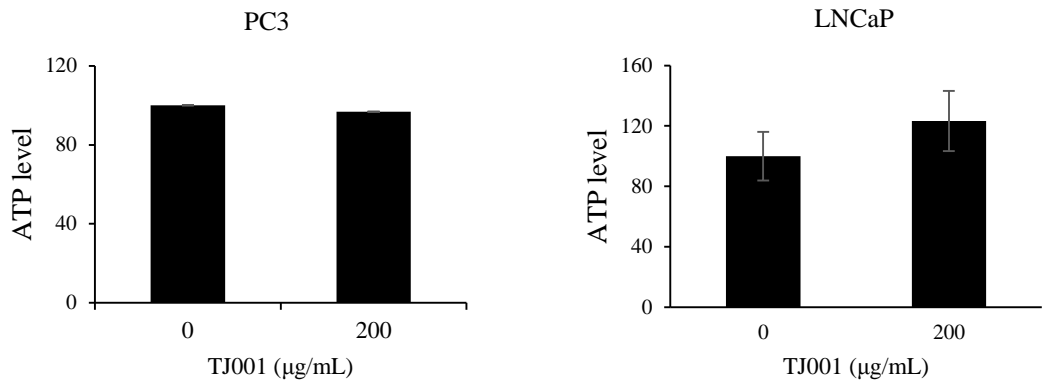

(a)

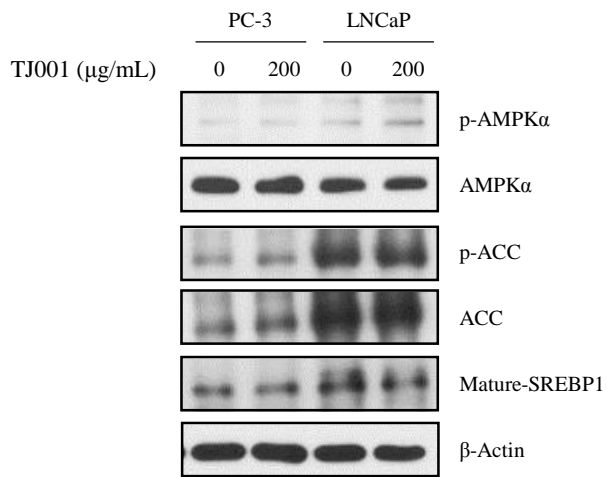

(b)

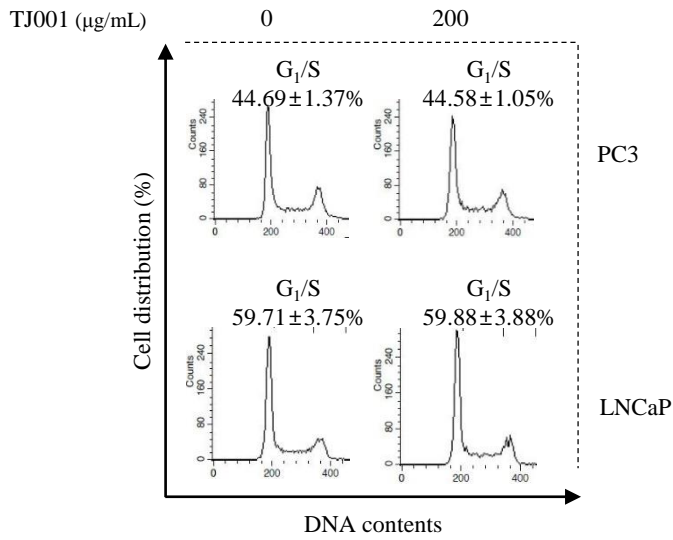

(a)

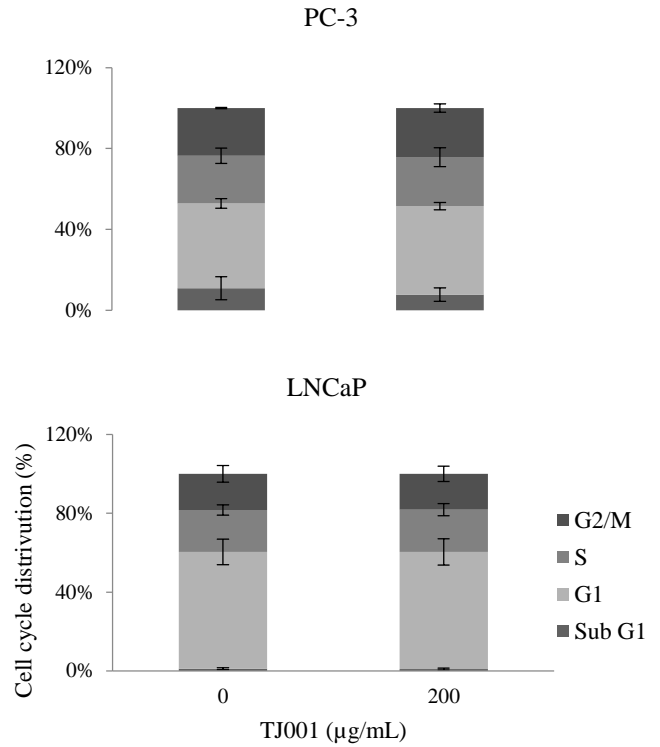

(b)

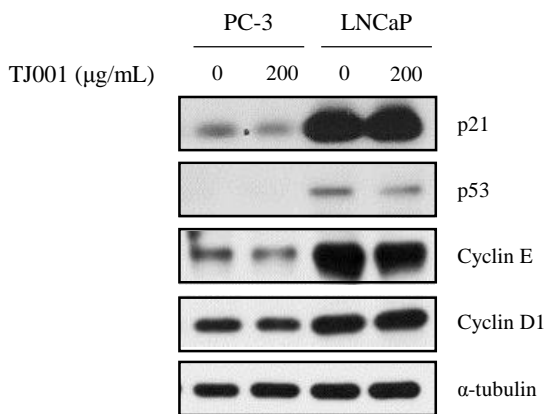

(c)

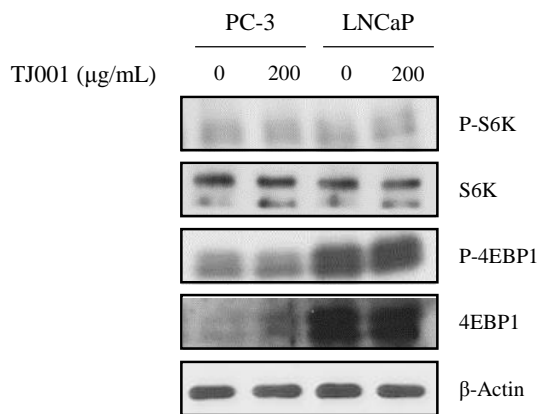

(d)
